# Supplementary material for: A recyclable process between a monomer and polyester with a natural catalyst
Source: Royal Society of Chemistry journal article supplement (doi:10.1039/d2gc03451d), 2022-01-01
Supplement: d2gc03451d1.pdf [file d2gc03451d1.pdf]

Supporting Information for

## **A recyclable process between monomer and polyester with a natural catalyst**

Qiao Zhang,<sup>a</sup> Chenyang Hu,<sup>a</sup> Ranlong Duan,<sup>a</sup> Yuezhou Huang,<sup>ab</sup> Xiang Li,<sup>a</sup> Zhiqiang Sun,<sup>a</sup>  
Xuan Pang,<sup>\*ab</sup> and Xuesi Chen<sup>ab</sup>

<sup>a</sup> Key Laboratory of Polymer Ecomaterials, Changchun Institute of Applied Chemistry, Chinese Academy of Sciences, 5625 Renmin Street, Changchun 130022 China.

<sup>b</sup> University of Science and Technology of China, Hefei 230026 China.

\*Corresponding author. Email: xpang@ciac.ac.cn; Tel: (+86) 431-85262588.

## Contents

### Pages S3–S4:

Experimental procedures

### Page S5:

$^1\text{H}$  and  $^{13}\text{C}\{^1\text{H}\}$  NMR spectra of PLA (Figures S1–S2)

### Pages S6–S8:

MALDI-TOF-MS for PLA catalyzed by **VCNa** (Figures S3–S5)

### Page S9:

$M_n$  and  $\mathcal{D}$  of PLA samples (Table S1)

### Page S10:

PLA methanolysis without catalyst (Table S2)

### Page S11:

$^1\text{H}$  NMR analysis of methanolysis of PLA (4032D) catalyzed by **VCNa** (Figure S6)

### Page S12:

PLA methanolysis catalyzed by 5 mol% **VCNa** (Table S3)

### Page S13:

PLA ethanolysis catalyzed by 5 mol% **VCNa** (Table S4)

### Page S14:

$^1\text{H}$  NMR,  $M_n$ , and  $\mathcal{D}$  for PLA based commercial products (Figure S7 and Table S5)

### Page S15:

Reaction from MLA to lactide without / with catalyst (Tables S6–S7)

### Page S16:

$^1\text{H}$  NMR (300 MHz,  $\text{CDCl}_3$ ) of lactide synthesized from MLA (Figure S8)

### Page S17:

**VC** or **VCNa** catalyzed ring-opening polymerizations of  $\epsilon$ -CL (Table S8)

### Page S18:

**VC** or **VCNa** catalyzed ring-opening polymerizations of  $\delta$ -VL (Table S9)

### Page S19:

**VC** or **VCNa** catalyzed ring-opening polymerizations of  $\beta$ -BL (Table S10)

### Page S20:

Ring-opening polymerizations of cyclic esters initiated by BnOH (Table S11)

### Page S21:

$^1\text{H}$  and  $^{13}\text{C}\{^1\text{H}\}$  NMR spectra of PCL (Figures S9–S10)

### Page S22:

$^1\text{H}$  and  $^{13}\text{C}\{^1\text{H}\}$  NMR spectra of PVL (Figures S11–S12)

### Page S23:

$^1\text{H}$  and  $^{13}\text{C}\{^1\text{H}\}$  NMR spectra of PHB (Figures S13–S14)

## Experimental Procedures

### Materials

L-lactide (L-LA),  $\epsilon$ -caprolactone ( $\epsilon$ -CL),  $\delta$ -valerolactone ( $\delta$ -VL),  $\beta$ -butyrolactone ( $\beta$ -BL), L-ascorbic acid (**VC**), sodium L-ascorbate (**VCNa**), mesitylene,  $\text{CH}_2\text{Cl}_2$ , EtOAc, MeOH, EtOH, and  $\text{CDCl}_3$  were purchased from Energy Chemical. L-LA was recrystallized from EtOAc and dried *in vacuo*.  $\epsilon$ -CL,  $\delta$ -VL, and  $\beta$ -BL were dried over  $\text{CaH}_2$  before distillation. PLA resins R190 and R290 were purchased from Zhejiang Hisun Biomaterials, and 4032D was purchased from NatureWorks.

### Instrument

$^1\text{H}$  NMR spectra were recorded with a 300 MHz Bruker NMR spectrometer at 23 °C.  $^{13}\text{C}$  NMR and DOSY NMR spectra were recorded with a 500 MHz Bruker NMR spectrometer at 23 °C. Size-exclusion chromatography (SEC) was conducted with a Waters 515 SEC with  $\text{CH}_2\text{Cl}_2$  as the eluent (flow rate: 1  $\text{mL min}^{-1}$  at 30 °C). The molecular weights were calibrated against linear polystyrene (PS) standards. *In situ* ATR-IR was monitored using a Mettler-Toledo ReactIR 15 spectrometer equipped with a MCT detector and a silver halide DiComp probe.

### General procedure of ROP

A model reaction using **VCNa** as the catalyst for ROP of L-LA to PLA was described herein. ROP reactions were carried out in a glove box in argon atmosphere. An ampule vial with a stir bar was dried at 130 °C overnight before quickly transferred to a glove box. **VCNa** (0.05 mmol), L-LA (5 mmol), and mesitylene (0.2 mL) were added to the ampule vial and sealed with a rubber stopper. The ampule vial was taken out of the glovebox and put in an oil bath at 170 °C for 24 h reaction. After the reaction, the ampule vial was cooled to room temperature. Then, 10 mL  $\text{CH}_2\text{Cl}_2$  was added to the sticky product in order to dissolve the product for calculating the conversion by  $^1\text{H}$  NMR. The product in  $\text{CH}_2\text{Cl}_2$  was transferred in a glass vial and  $\text{CH}_2\text{Cl}_2$  was removed *in vacuo*. The product was washed with EtOH for three times and dried *in vacuo*.  $M_n$  and  $D$  for the polymer products were determined by SEC.

For the ROP reactions with initiator, the procedure was like ROP reactions mentioned above.

For the ROP reactions in air, the procedure was like ROP reactions in dry condition. However, the ampule vials were not dried on purpose. The monomer and catalyst were exposed in air for 1 h before the reaction.

### General procedure of alcoholysis of PLA

PLA resin R190 (4 mmol lactidyl unit), **VCNa** (0.04 mmol), MeOH (100 mmol) were added in a thick wall pressure tube. The reaction mixture was heated at 120 °C for 1 h. A small aliquot was taken out for determination of conversion by  $^1\text{H}$  NMR.

**General procedure of the reaction from MLA to of lactide**

MLA (31.2 g, 0.3 mol) and **VCNa** (2.97 g, 0.015 mol) were added in 100 mL round bottom flask. The reaction mixture was heated at 130 °C for 48 h. A small aliquot was taken out for determination of conversion by <sup>1</sup>H NMR. The unreacted MLA was removed *in vacuo*, and the mixture was heated at 200 °C for 6 h with a distillation setup *in vacuo*. White solid was collected, and <sup>1</sup>H NMR illustrated that the product was lactide.

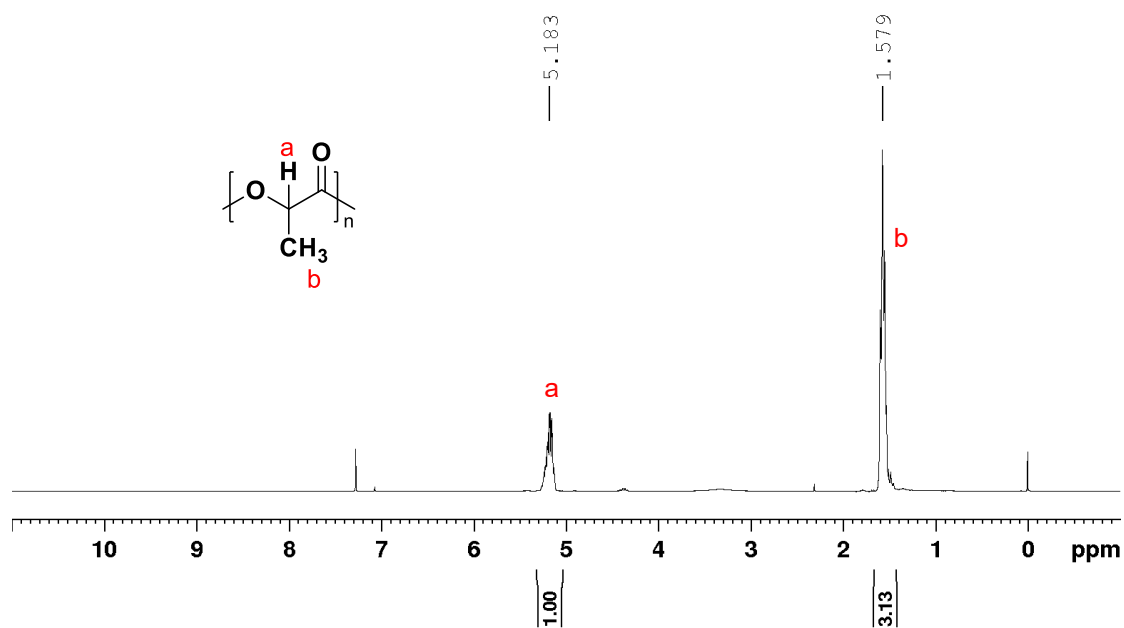

Figure S1.  $^1\text{H}$  NMR of PLA (300 MHz,  $\text{CDCl}_3$ ).

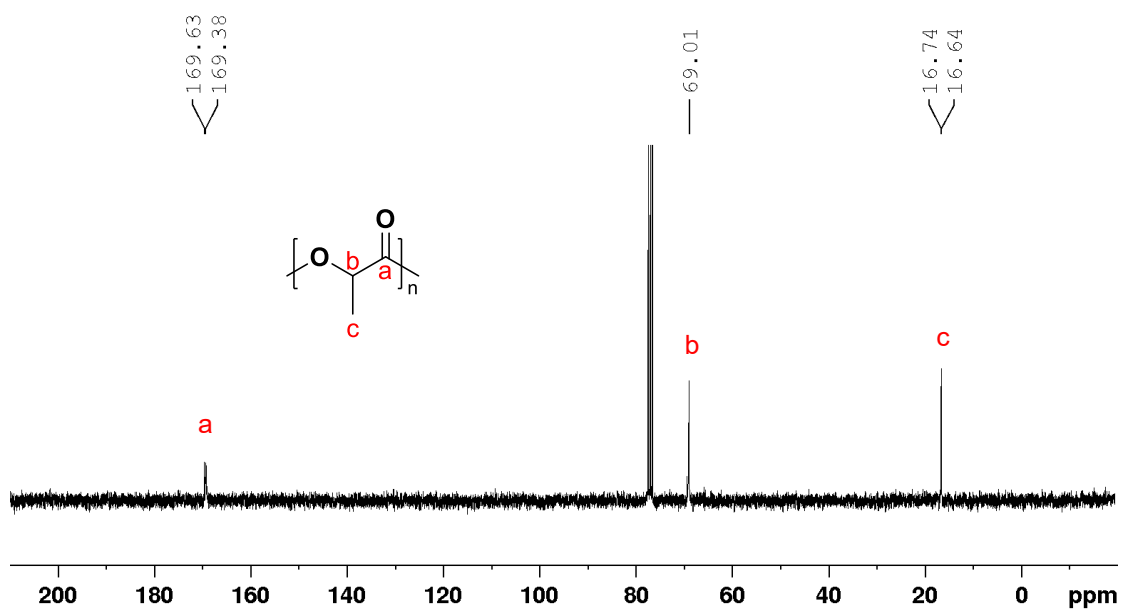

Figure S2.  $^{13}\text{C}\{^1\text{H}\}$  NMR of PLA (75 MHz,  $\text{CDCl}_3$ ).

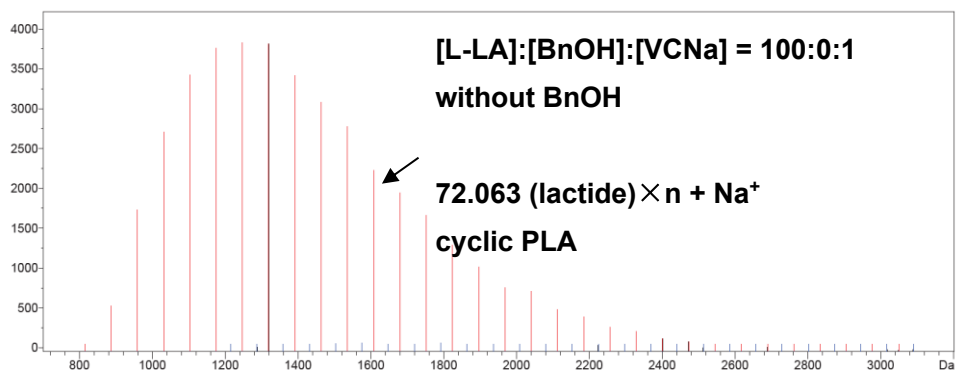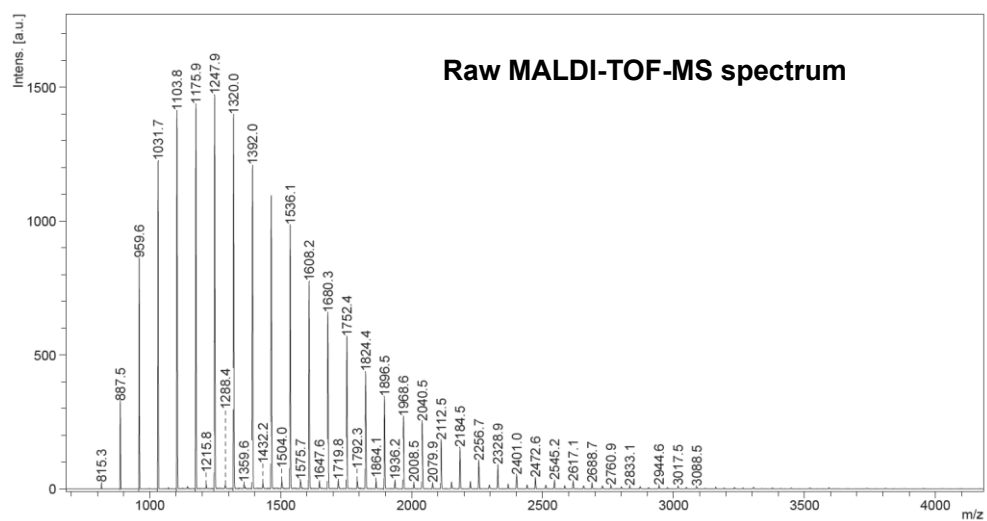

Figure S3. MALDI-TOF-MS for PLA catalyzed by VCNa without initiator.

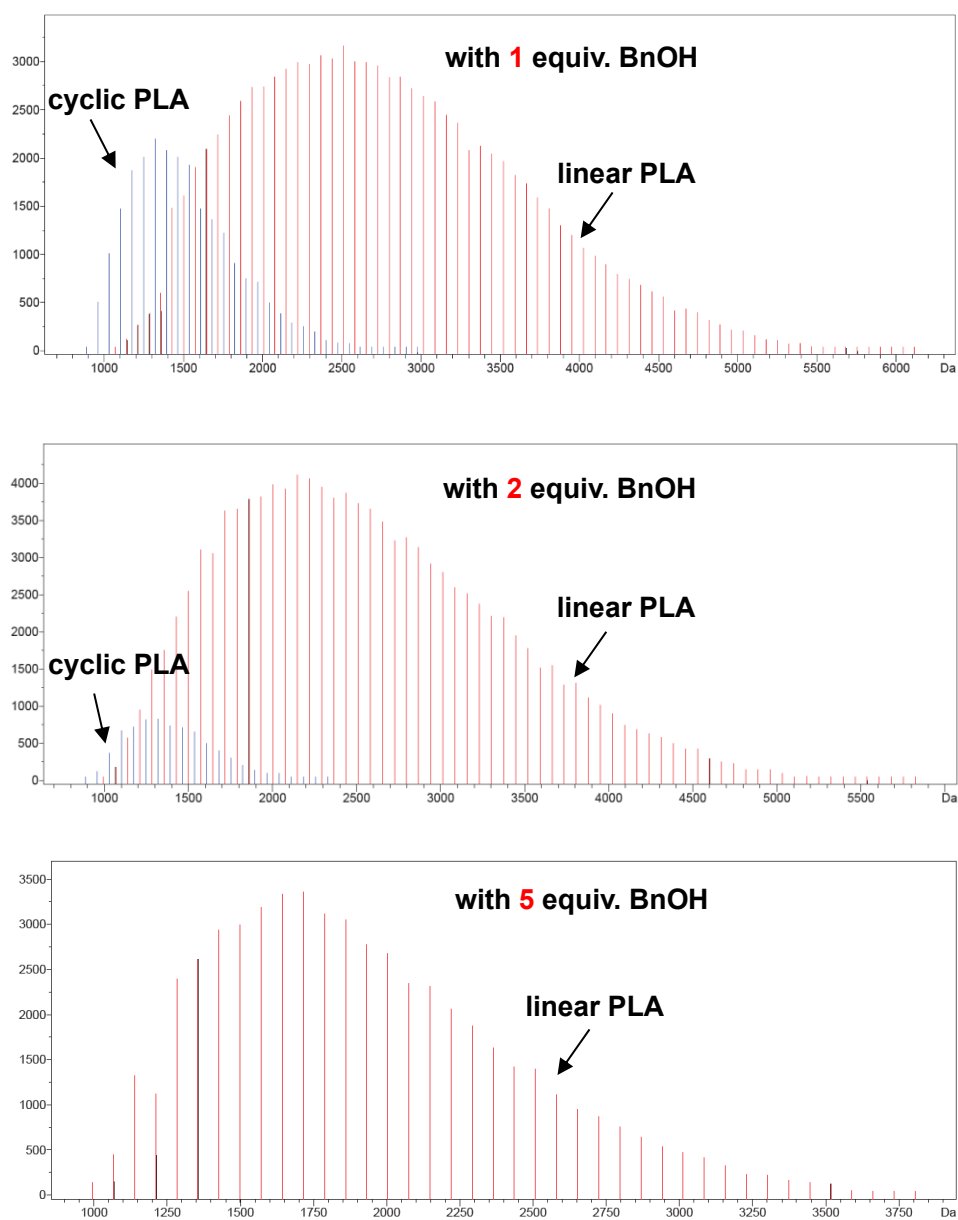

**Figure S4.** MALDI-TOF-MS for PLA catalyzed by VCNa with various amount of initiator.  $[L-LA]:[BnOH]:[VCNa] = 100:n:1$  ( $n = 1, 2, \text{ or } 5$ )

(A) [L-LA]:[BnOH]:[VCNa] = 100:1:1

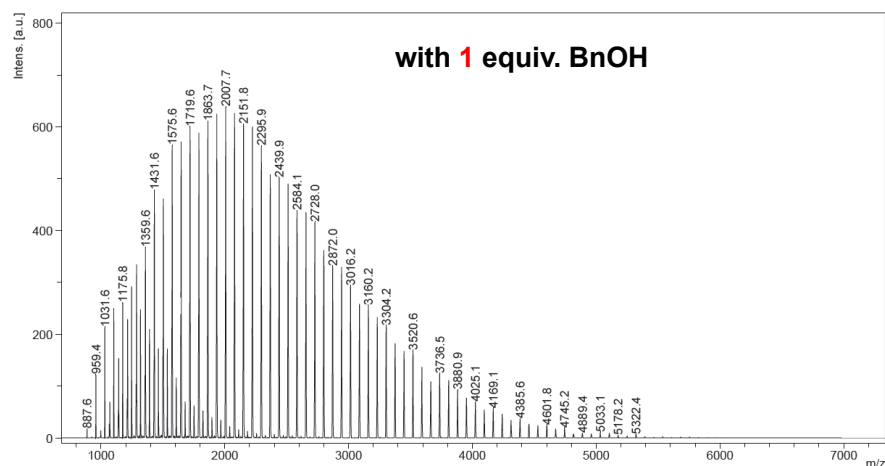

(B) [L-LA]:[BnOH]:[VCNa] = 100:2:1

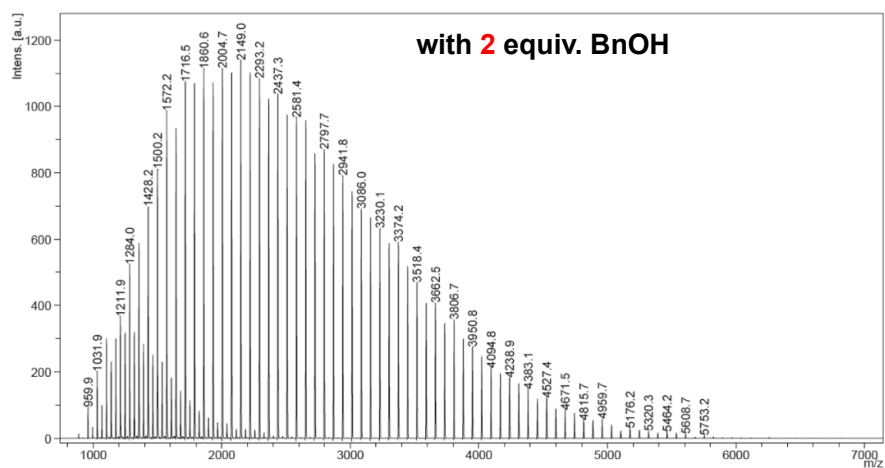

(C) [L-LA]:[BnOH]:[VCNa] = 100:5:1

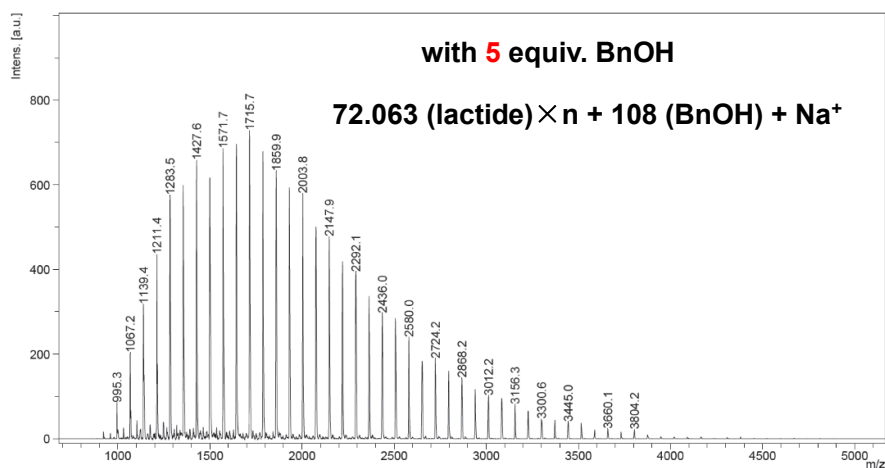

**Figure S5.** Raw MALDI-TOF-MS spectra for PLA catalyzed by VCNa with various amount of initiator attached to Figure S4.



**Table S1.**  $M_n$  and  $D$  of PLA samples.

| PLA resin sample | source                      | $M_n$ (kg mol <sup>-1</sup> ) <sup>a</sup> | $D$ <sup>a</sup> |
|------------------|-----------------------------|--------------------------------------------|------------------|
| Revode190 (R190) | Zhejiang Hisun Biomaterials | 98.1                                       | 1.66             |
| Revode290 (R290) | Zhejiang Hisun Biomaterials | 87.8                                       | 1.46             |
| 4032D            | NatureWorks                 | 111.0                                      | 1.56             |

<sup>a</sup> Determined by SEC using CH<sub>2</sub>Cl<sub>2</sub> as the solvent.

**Table S2.** PLA methanolysis without catalyst. <sup>a</sup>

| entry | PLA resin sample | <i>T</i> (°C) | time (h) | conv. (%) <sup>b</sup> |
|-------|------------------|---------------|----------|------------------------|
| 1     | R190             | 120           | 1        | 0                      |
| 2     | R290             | 120           | 1        | 0                      |
| 3     | 4032D            | 120           | 1        | 0                      |

<sup>a</sup> Reaction conditions: PLA resin (4 mmol lactidyl repeating unit), methanol (100 mmol). <sup>b</sup> Determined by <sup>1</sup>H NMR (300 MHz, CDCl<sub>3</sub>).

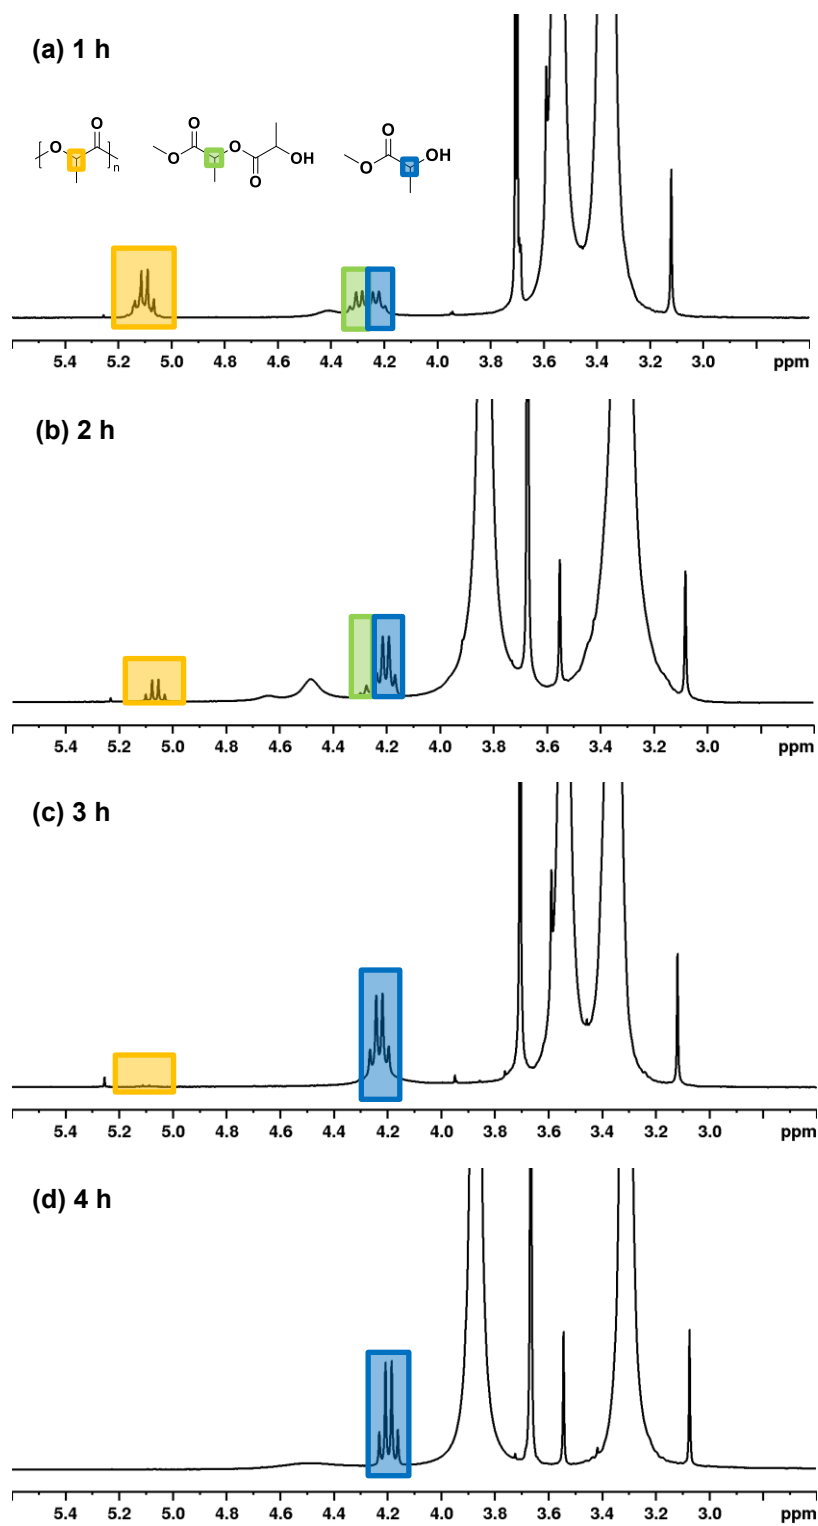

**Figure S6.**  $^1\text{H}$  NMR analysis (300 MHz,  $\text{CDCl}_3$ ) of methanolysis of PLA (4032D) catalyzed by **VCNa** corresponding to Table 2 entry 3.

**Table S3.** PLA methanolysis catalyzed by 5 mol% **VCNa**<sup>a</sup>

| entry | PLA resin sample | <i>T</i> (°C) | time (h) | conv. (%) <sup>b</sup> | MLA:dimer <sup>b</sup> |
|-------|------------------|---------------|----------|------------------------|------------------------|
| 1     | R190             | 120           | 0.5      | 99                     | 99:1                   |
| 2     | R190             | 120           | 1        | 100                    | 100:0                  |
| 3     | R190             | 80            | 1        | N/A <sup>c</sup>       | N/A                    |
| 4     | R290             | 120           | 1        | 97                     | 100:0                  |
| 5     | 4032D            | 120           | 1        | 95                     | 85:15                  |
| 6     | 4032D            | 120           | 2        | 97                     | 100:0                  |

<sup>a</sup> Reaction condition: PLA resin (4 mmol lactidyl repeating unit), **VCNa** (0.2 mmol, 5 mol%), MeOH (100 mmol). <sup>b</sup> Determined by <sup>1</sup>H NMR (300 MHz CDCl<sub>3</sub>). <sup>c</sup> Most of the PLA samples remained resin type at 80 °C.

**Table S4.** PLA ethanolysis catalyzed by 5 mol% **VCNa**<sup>a</sup>

| entry | PLA resin sample | time (h) | conv. (%) <sup>b</sup> | ELA:dimer <sup>b</sup> |
|-------|------------------|----------|------------------------|------------------------|
| 1     | R190             | 3        | 75                     | 80:20                  |
|       |                  | 18       | 97                     | 95:5                   |
| 2     | R290             | 3        | 79                     | 79:21                  |
|       |                  | 18       | 98                     | 96:4                   |
| 3     | 4032D            | 3        | 74                     | 78:22                  |
|       |                  | 18       | 97                     | 95:5                   |

<sup>a</sup> Reaction condition: PLA resin (4 mmol lactidyl repeating unit), **VCNa** (0.2 mmol, 5 mol%), EtOH (100 mmol), 120 °C. <sup>b</sup> Determined by <sup>1</sup>H NMR (300 MHz CDCl<sub>3</sub>).

(A) 3D printing material

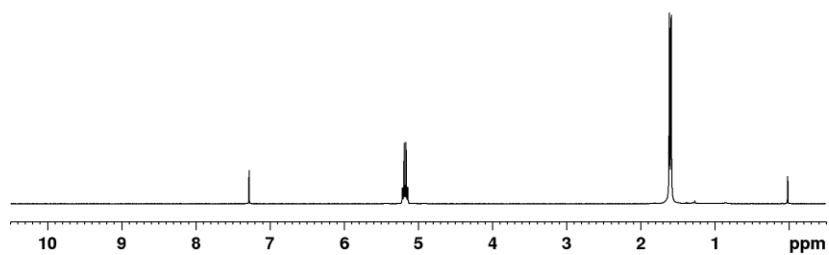

(B) ballpoint pen

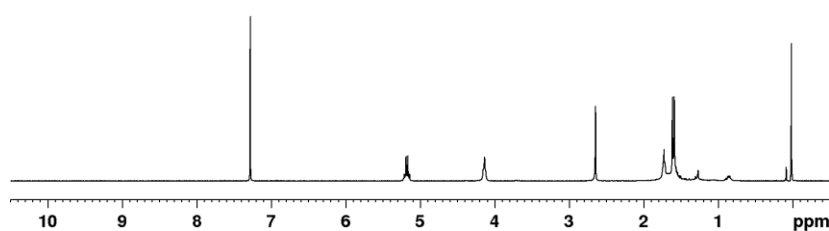

(C) space bottle

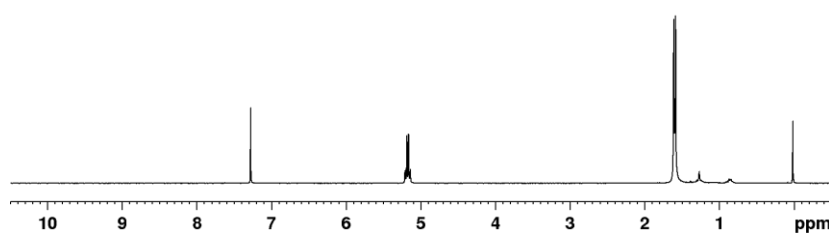

**Figure S7.**  $^1\text{H}$  NMR (300 MHz,  $\text{CDCl}_3$ ) of PLA based commercial products.

**Table S5.**  $M_n$  and  $D$  of PLA based commercial products.

| sample               | $M_n$ ( $\text{kg mol}^{-1}$ ) <sup>a</sup> | $D$ <sup>a</sup> |
|----------------------|---------------------------------------------|------------------|
| 3D printing material | 125.8                                       | 1.52             |
| ballpoint pen        | 202.0                                       | 1.25             |
| space bottle         | 134.0                                       | 1.45             |

<sup>a</sup> Determined by SEC using  $\text{CH}_2\text{Cl}_2$  as the solvent.

**Table S6.** Reaction from MLA to PLA oligomer without / with catalyst <sup>a</sup>

| entry | reactant | product      | catalyst    | <i>T</i> (°C) | time (h) | conv. (%) <sup>b</sup> |
|-------|----------|--------------|-------------|---------------|----------|------------------------|
| 1     | MLA      | PLA oligomer | N/A         | 130           | 24       | 1.2                    |
| 2     | MLA      | PLA oligomer | <b>VCNa</b> | 130           | 48       | 48                     |

<sup>a</sup> Reaction condition: MLA (0.3 mol), **VCNa** (5 mol% for entry 2). <sup>b</sup> Determined by <sup>1</sup>H NMR (300 MHz CDCl<sub>3</sub>).

**Table S7.** Reaction from PLA oligomer to lactide without / with catalyst during a short time in order to test the efficiency of the catalyst <sup>a</sup>

| entry | reactant                  | product | catalyst    | <i>T</i> (°C) | yield (g) |
|-------|---------------------------|---------|-------------|---------------|-----------|
| 1     | PLA oligomer <sup>b</sup> | lactide | N/A         | 200           | 2.35      |
| 2     | PLA oligomer <sup>b</sup> | lactide | <b>VCNa</b> | 200           | 5.13      |

<sup>a</sup> Reaction condition: PLA oligomer (21.5 g), **VCNa** (for entry 2), 1.5 h. <sup>b</sup> from the previous step in Table S5.

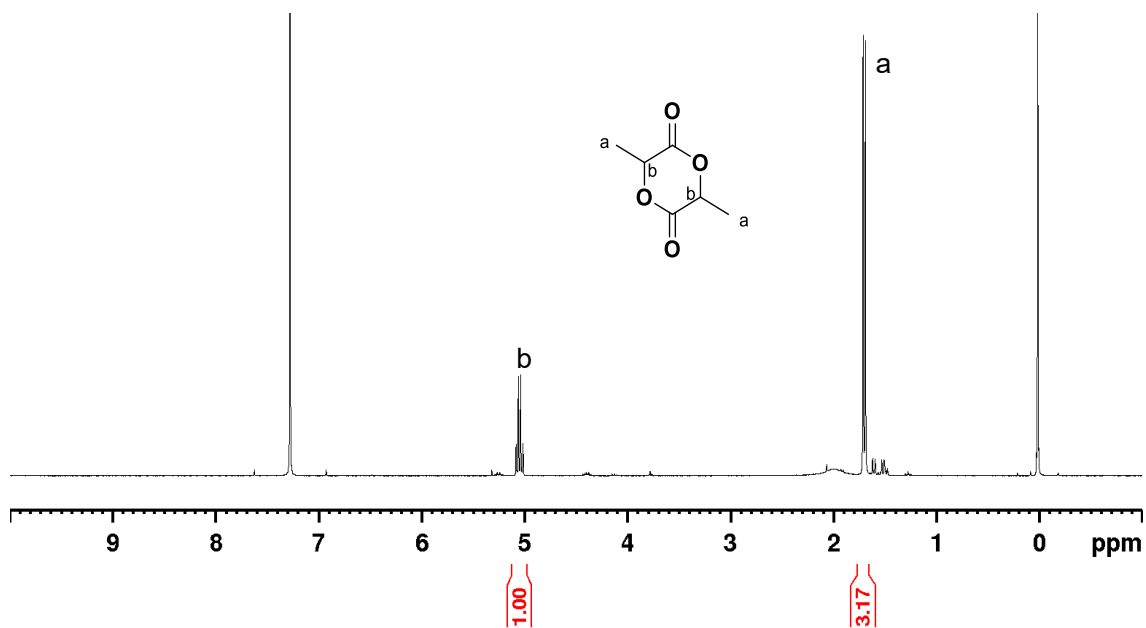

**Figure S8.** <sup>1</sup>H NMR (300 MHz, CDCl<sub>3</sub>) of lactide synthesized from MLA.



**Table S8.** VC or VCNa catalyzed ring-opening polymerizations of  $\epsilon$ -CL.<sup>a</sup>

| entry | catalyst    | [M]:[cat.] | <i>T</i> (°C) | time (h) | conv. (%) <sup>b</sup> | <i>M</i> <sub>n</sub> (kg mol <sup>-1</sup> ) <sup>c</sup> | <i>D</i> <sup>c</sup> |
|-------|-------------|------------|---------------|----------|------------------------|------------------------------------------------------------|-----------------------|
| 1     | <b>VC</b>   | 100:1      | 170           | 24       | 96                     | 15.8                                                       | 1.63                  |
| 2     | <b>VCNa</b> | 100:1      | 170           | 24       | 99                     | 14.1                                                       | 1.58                  |
| 3     | <b>VC</b>   | 100:1      | 120           | 24       | 6                      | N/A                                                        | N/A                   |
| 4     | <b>VCNa</b> | 100:1      | 120           | 24       | 11                     | N/A                                                        | N/A                   |
| 5     | <b>VC</b>   | 200:1      | 170           | 48       | 93                     | 29.3                                                       | 1.79                  |
| 6     | <b>VC</b>   | 400:1      | 170           | 96       | 43                     | 14.9                                                       | 1.26                  |
| 7     | <b>VCNa</b> | 400:1      | 170           | 96       | 97                     | 36.1                                                       | 1.71                  |
| 8     | <b>VCNa</b> | 1000:1     | 170           | 96       | 46                     | N/A                                                        | N/A                   |
| 9     | N/A         | N/A        | 170           | 24       | 0                      | N/A                                                        | N/A                   |

<sup>a</sup> Reaction conditions: catalyst (0.05 mmol), the amount of  $\epsilon$ -CL was determined by [M]:[cat.] ratio. <sup>b</sup> Determined by <sup>1</sup>H NMR (300 MHz, CDCl<sub>3</sub>). <sup>c</sup> Determined by SEC using CH<sub>2</sub>Cl<sub>2</sub> as the solvent.

**Table S9.** VC or VCNa catalyzed ring-opening polymerizations of  $\delta$ -VL.<sup>a</sup>

| entry | catalyst    | [M]:[cat.] | <i>T</i> (°C) | time (h) | conv. (%) <sup>b</sup> | <i>M<sub>n</sub></i> (kg mol <sup>-1</sup> ) <sup>c</sup> | <i>D</i> <sup>c</sup> |
|-------|-------------|------------|---------------|----------|------------------------|-----------------------------------------------------------|-----------------------|
| 1     | <b>VC</b>   | 100:1      | 170           | 24       | 73                     | 11.8                                                      | 1.49                  |
| 2     | <b>VCNa</b> | 100:1      | 170           | 24       | 74                     | 11.6                                                      | 1.68                  |
| 3     | <b>VC</b>   | 100:1      | 120           | 24       | 40                     | N/A                                                       | N/A                   |
| 4     | <b>VCNa</b> | 100:1      | 120           | 24       | 24                     | N/A                                                       | N/A                   |
| 5     | <b>VC</b>   | 200:1      | 170           | 48       | 81                     | 14.9                                                      | 1.49                  |
| 6     | <b>VCNa</b> | 200:1      | 170           | 48       | 86                     | 18.3                                                      | 1.64                  |
| 7     | <b>VC</b>   | 400:1      | 170           | 48       | 75                     | 25.1                                                      | 1.73                  |
| 8     | <b>VCNa</b> | 400:1      | 170           | 48       | 79                     | 22.5                                                      | 1.70                  |
| 9     | N/A         | N/A        | 170           | 24       | 0                      | N/A                                                       | N/A                   |

<sup>a</sup> Reaction conditions: catalyst (0.05 mmol), the amount of  $\delta$ -VL was determined by [M]:[cat.] ratio. <sup>b</sup> Determined by <sup>1</sup>H NMR (300 MHz, CDCl<sub>3</sub>). <sup>c</sup> Determined by SEC using CH<sub>2</sub>Cl<sub>2</sub> as the solvent.

**Table S10.** VC or VCNa catalyzed ring-opening polymerizations of  $\beta$ -BL.<sup>a</sup>

| entry | catalyst    | [M]:[cat.] | <i>T</i> (°C) | time (h) | conv. (%) <sup>b</sup> | <i>M<sub>n</sub></i> (kg mol <sup>-1</sup> ) <sup>c</sup> | <i>D</i> <sup>c</sup> |
|-------|-------------|------------|---------------|----------|------------------------|-----------------------------------------------------------|-----------------------|
| 1     | <b>VC</b>   | 100:1      | 70            | 24       | 7                      | N/A                                                       | N/A                   |
| 2     | <b>VCNa</b> | 100:1      | 70            | 24       | 16                     | N/A                                                       | N/A                   |
| 3     | <b>VC</b>   | 100:1      | 120           | 24       | 45                     | N/A                                                       | N/A                   |
| 4     | <b>VCNa</b> | 100:1      | 120           | 24       | 98                     | 3.7                                                       | 1.38                  |
| 5     | <b>VCNa</b> | 200:1      | 120           | 24       | 97                     | 9.7                                                       | 1.35                  |
| 6     | <b>VCNa</b> | 400:1      | 120           | 48       | 82                     | 16.9                                                      | 1.12                  |
| 7     | N/A         | N/A        | 120           | 24       | 27                     | N/A                                                       | N/A                   |

<sup>a</sup> Reaction conditions: catalyst (0.05 mmol), the amount of  $\beta$ -BL was determined by [M]:[cat.] ratio. Reactions were carried out in thick wall pressure glass tubes. <sup>b</sup> Determined by <sup>1</sup>H NMR (300 MHz, CDCl<sub>3</sub>). <sup>c</sup> Determined by SEC using CH<sub>2</sub>Cl<sub>2</sub> as the solvent.

**Table S11.** Ring-opening polymerizations of cyclic esters initiated by BnOH.<sup>a</sup>

| entry | monomer | catalyst    | <i>T</i> (°C) | time (h) | conv. (%) <sup>b</sup> | <i>M<sub>n</sub></i> (kg mol <sup>-1</sup> ) <sup>c</sup> | <i>D</i> <sup>c</sup> |
|-------|---------|-------------|---------------|----------|------------------------|-----------------------------------------------------------|-----------------------|
| 1     | ε-CL    | <b>VC</b>   | 170           | 24       | 88                     | 8.8                                                       | 1.69                  |
| 2     | ε-CL    | <b>VCNa</b> | 170           | 24       | 93                     | 10.6                                                      | 1.50                  |
| 3     | δ-VL    | <b>VC</b>   | 170           | 24       | 87                     | 5.7                                                       | 1.64                  |
| 4     | δ-VL    | <b>VCNa</b> | 170           | 24       | 89                     | 4.7                                                       | 1.54                  |
| 5     | β-BL    | <b>VCNa</b> | 120           | 24       | 90                     | 3.1                                                       | 1.51                  |

<sup>a</sup> Reaction conditions: monomer (20 mmol), catalyst (0.2 mmol), BnOH (0.2 mmol), [monomer]:[catalyst]:[BnOH] = 100:1:1. <sup>b</sup> Determined by <sup>1</sup>H NMR (300 MHz, CDCl<sub>3</sub>). <sup>c</sup> Determined by SEC using CH<sub>2</sub>Cl<sub>2</sub> as the solvent.

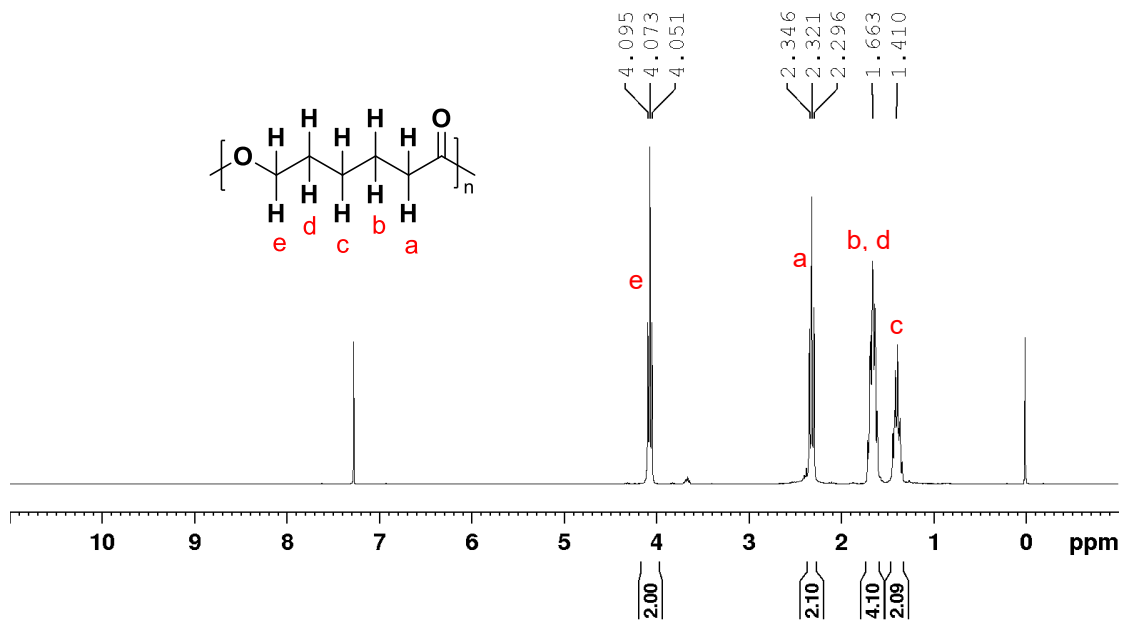

Figure S9.  $^1\text{H}$  NMR of PCL (300 MHz,  $\text{CDCl}_3$ ).

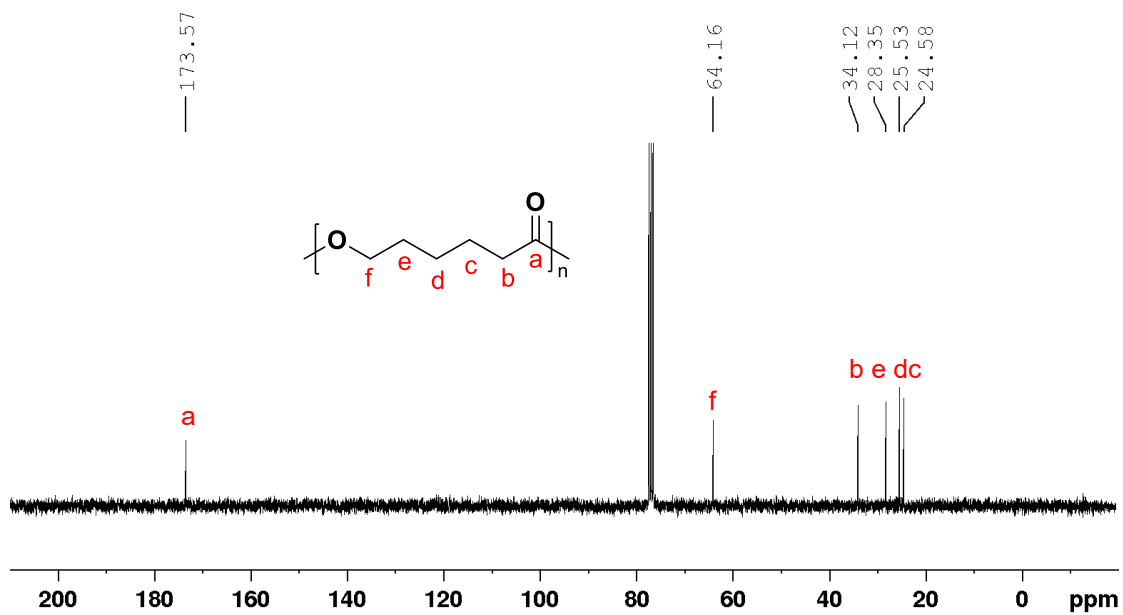

Figure S10.  $^{13}\text{C}\{^1\text{H}\}$  NMR of PCL (75 MHz,  $\text{CDCl}_3$ ).

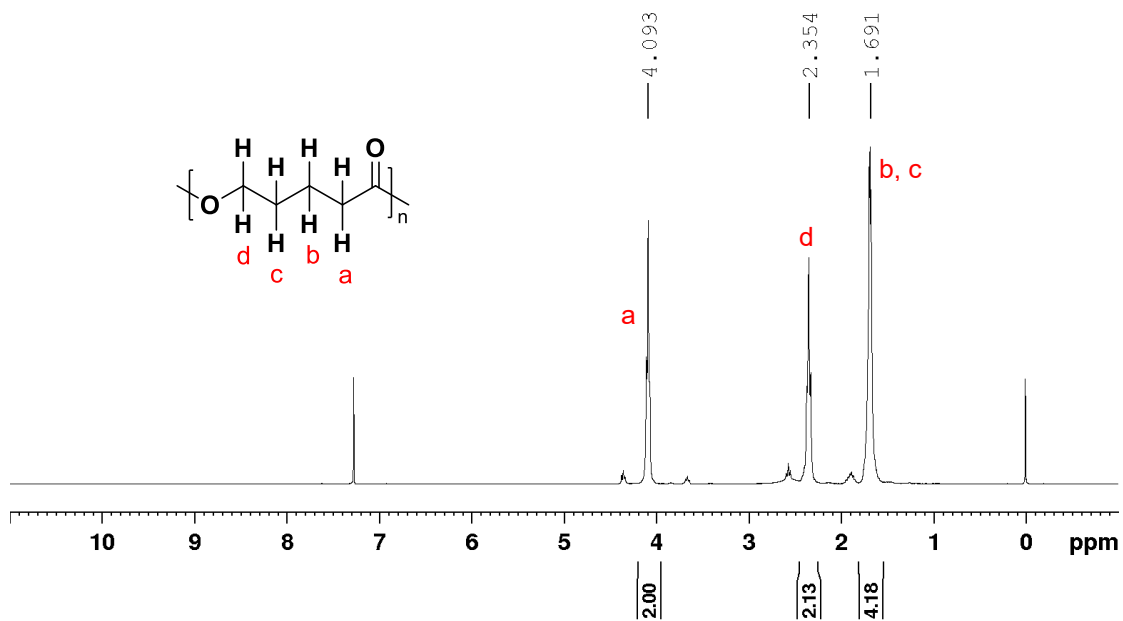

Figure S11.  $^1\text{H}$  NMR of PVL (300 MHz,  $\text{CDCl}_3$ ).

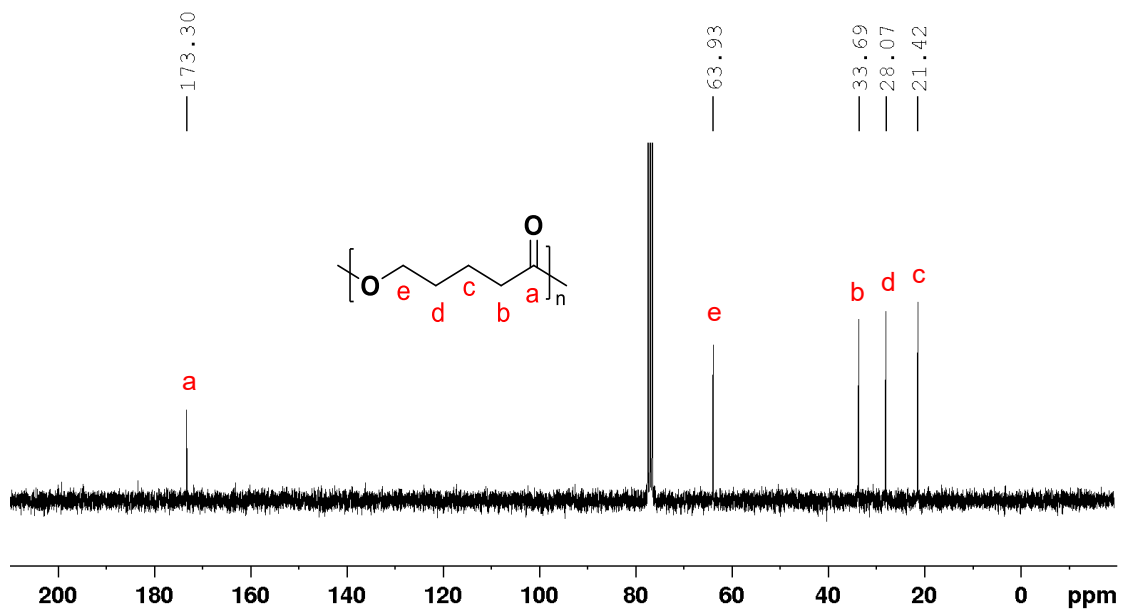

Figure S12.  $^{13}\text{C}\{^1\text{H}\}$  NMR of PVL (75 MHz,  $\text{CDCl}_3$ ).

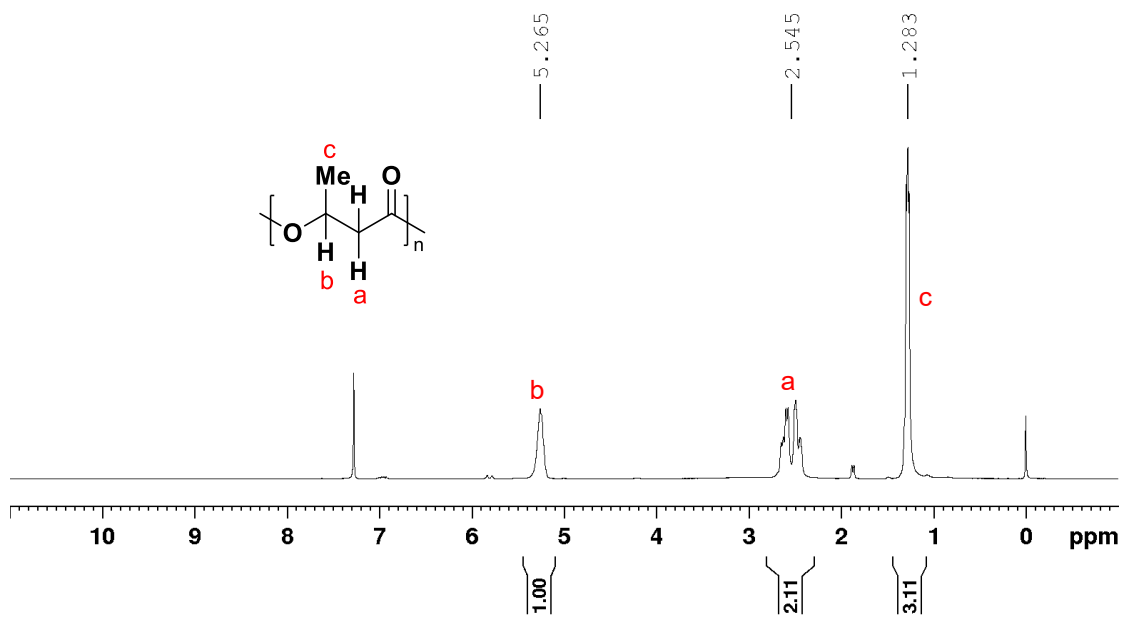

Figure S13.  $^1\text{H}$  NMR of PHB (300 MHz,  $\text{CDCl}_3$ ).

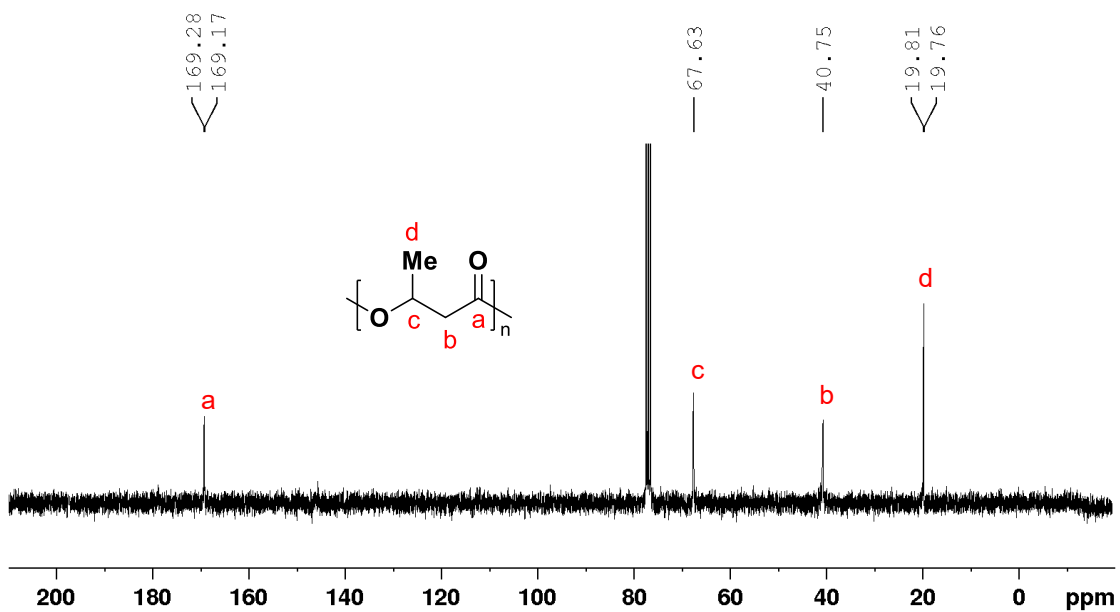

Figure S14.  $^{13}\text{C}\{^1\text{H}\}$  NMR of PHB (75 MHz,  $\text{CDCl}_3$ ).
